# Supplementary material
Source: publisher figshare collection journal article supplement (https://gsajournals.figshare.com/ndownloader/files/25452551)
Supplement: Supplementary file 1 [file 25452551]

## Sheet: Table S10
Table S10. Nigon element-defining loci in seventeen nematode genomes
Nigon	A	B	C	D	E	N	X	total	Proportion
Ascaris suum	477	304	462	254	224	162	114	1997	0.91
Auanema rhodensis	521	315	495	272	227	169	100	2099	0.96
Brugia malayi	530	324	516	271	239	171	119	2170	0.99
Caenorhabditis briggsae	518	317	504	269	235	173	119	2135	0.97
Caenorhabditis elegans	529	326	517	272	240	172	119	2175	0.99
Caenorhabditis nigoni	505	315	491	247	227	166	109	2060	0.94
Caenorhabditis remanei	491	306	482	242	220	166	115	2022	0.92
Caenorhabditis inopinata	526	318	507	271	239	172	119	2152	0.98
Haemonchus contortus	520	317	509	271	236	160	108	2121	0.97
Meloidogyne hapla	429	257	419	210	170	122	81	1688	0.77
Onchocerca volvulus	526	322	510	273	234	170	117	2152	0.98
Oscheius tipulae	516	320	501	269	216	173	118	2113	0.96
Pristionchus pacificus	453	297	466	248	223	163	113	1963	0.9
Steinernema carpocapsae	497	291	474	258	231	156	112	2019	0.92
Strongyloides ratti	509	309	484	252	234	170	114	2072	0.95
Bursaphelenchus xylophilus	449	279	427	235	196	146	96	1828	0.83
Bursaphelenchus okinawaensis	448	280	416	238	190	149	97	1818	0.83
Total loci per Nigon	534	328	519	275	242	174	119	2191	1
